# Supplementary material
Source: PubMed Central journal article supplement (PMC7187596)
Supplement: AAC.01595-19-s0001.pdf [file AAC.01595-19-s0001.pdf]

**% MDR/XDR strains with MIC  $\leq$  4  $\mu$ g/ml**

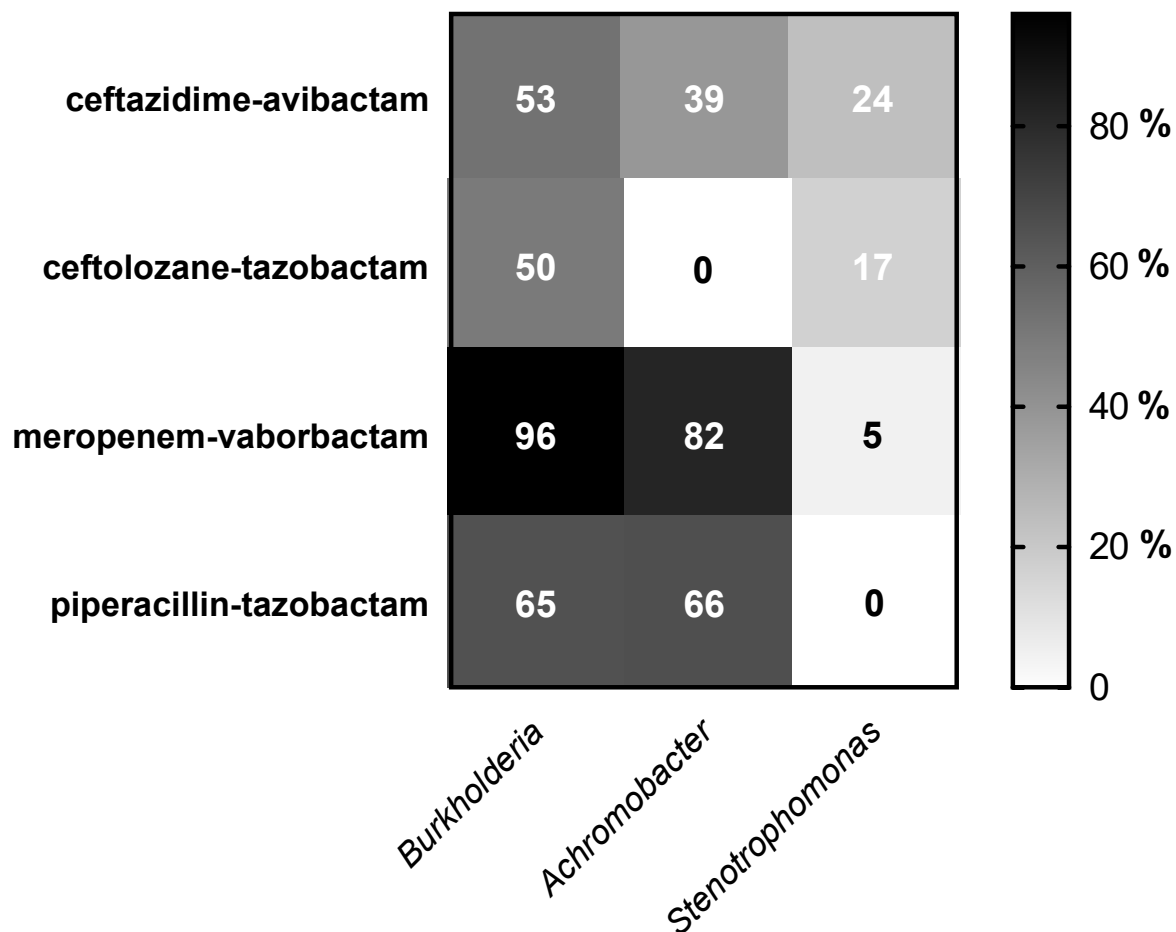

**SUPPLEMENTAL FIGURE 1:** Activities of  $\beta$  lactam- $\beta$ -lactamase inhibitor agents against MDR/XDR *Burkholderia* (n=118), *Achromobacter* (n=76), and *Stenotrophomonas* (n=88) strains. Shown are the percentage of MDR/XDR strains in each group with MIC  $\leq$  4  $\mu$ g/ml.

**SUPPLEMENTAL TABLE 1** Activities (MIC<sub>50</sub> / MIC<sub>90</sub> in µg/ml) of β-lactam-β-lactamase inhibitor agents against *Burkholderia* spp.

| Species or group        |                                    |                                |                            |                                |                             |                                |                                  |
|-------------------------|------------------------------------|--------------------------------|----------------------------|--------------------------------|-----------------------------|--------------------------------|----------------------------------|
| Antimicrobial           | <i>Burkholderia</i> spp. (n = 200) | <i>B. cenocepacia</i> (n = 50) | <i>B. cepacia</i> (n = 20) | <i>B. contaminans</i> (n = 10) | <i>B. gladioli</i> (n = 50) | <i>B. multivorans</i> (n = 50) | <i>B. vietnamiensis</i> (n = 20) |
| ceftazidime-avibactam   | 4 / 16                             | 4 / 4                          | 4 / 8                      | 4 / 4                          | 16 / 16                     | 2 / 4                          | 2 / 2                            |
| ceftolozane-tazobactam  | 2 / 16                             | 1 / 4                          | 1 / 8                      | 2 / 2                          | 16 / 32                     | 1 / 32                         | 1 / 2                            |
| meropenem-vaborbactam   | 1 / 2                              | 1 / 2                          | 1 / 2                      | 1 / 1                          | 1 / 2                       | 1 / 2                          | 0.5 / 0.5                        |
| piperacillin-tazobactam | ≤2 / 32                            | 4 / 128                        | 16 / 64                    | 8 / 32                         | ≤2 / ≤2                     | ≤2 / >128                      | ≤2 / ≤2                          |

**SUPPLEMENTAL TABLE 2** Activities (MIC<sub>50</sub> / MIC<sub>90</sub> in µg/ml) of β-lactam-β-lactamase inhibitor agents against *Achromobacter* spp., *Stenotrophomonas maltophilia*, and *Pandoraea* spp.

| Species or group        |                                     |                           |                              |                                 |                                 |                               |                           |                             |
|-------------------------|-------------------------------------|---------------------------|------------------------------|---------------------------------|---------------------------------|-------------------------------|---------------------------|-----------------------------|
| Antimicrobial           | <i>Achromobacter</i> spp. (n = 100) | <i>A. dolens</i> (n = 25) | <i>A. ruhlandii</i> (n = 25) | <i>A. xylosoxidans</i> (n = 50) | <i>S. maltophilia</i> (n = 100) | <i>Pandoraea</i> spp (n = 20) | <i>P. apista</i> (n = 10) | <i>P. sputorum</i> (n = 10) |
| ceftazidime-avibactam   | 8 / 32                              | 8 / 16                    | 8 / 16                       | 8 / 32                          | 16 / >32                        | >32 / >32                     | >32 / >32                 | >32 / >32                   |
| ceftolozane-tazobactam  | >32 / >32                           | >32 / >32                 | >32 / >32                    | >32 / >32                       | 32 / >32                        | >32 / >32                     | >32 / >32                 | >32 / >32                   |
| meropenem-vaborbactam   | ≤0.5 / 8                            | ≤0.5 / 4                  | 2 / 16                       | ≤0.5 / 8                        | >32 / >32                       | >32 / >32                     | >32 / >32                 | >32 / >32                   |
| piperacillin-tazobactam | ≤2 / 128                            | ≤2 / >128                 | 8 / 128                      | ≤2 / 16                         | 128 / >128                      | 64 / >128                     | >128 / >128               | 64 / 128                    |

**SUPPLEMENTAL TABLE 3** Activities of antimicrobial agents against bacterial strains

| Species or group                              | Antimicrobial                 | MIC (µg/ml) |                   |                   |
|-----------------------------------------------|-------------------------------|-------------|-------------------|-------------------|
|                                               |                               | Range       | MIC <sub>50</sub> | MIC <sub>90</sub> |
| <i>Achromobacter</i> , all isolates (n = 100) | Aztreonam                     | 32 to >32   | >32               | >32               |
|                                               | Ceftazidime                   | 1 to >32    | 8                 | 32                |
|                                               | Ceftazidime-avibactam         | 1 to >32    | 8                 | 32                |
|                                               | Ciprofloxacin                 | ≤0.5 to >8  | 4                 | >8                |
|                                               | Colistin                      | ≤0.5 to >8  | 4                 | >8                |
|                                               | Ceftolozane-tazobactam        | ≤0.5 to >32 | >32               | >32               |
|                                               | Imipenem                      | ≤0.5 to >32 | 2                 | 8                 |
|                                               | Levofloxacin                  | ≤0.5 to >8  | 4                 | >8                |
|                                               | Meropenem                     | ≤0.5 to >32 | 1                 | >32               |
|                                               | Meropenem-vaborbactam         | ≤0.5 to 32  | ≤0.5              | 8                 |
|                                               | Minocycline                   | ≤0.25 to 16 | 2                 | 8                 |
|                                               | Moxifloxacin                  | ≤0.5 to >8  | 4                 | >8                |
|                                               | Piperacillin-tazobactam       | ≤2 to >128  | ≤2                | 128               |
|                                               | Tigecycline                   | ≤0.25 to 4  | 1                 | 2                 |
|                                               | Trimethoprim-sulfamethoxazole | ≤0.5 to >8  | ≤0.5              | 4                 |

| Species or group                        | Antimicrobial                 | MIC (µg/ml) |                   |                   |
|-----------------------------------------|-------------------------------|-------------|-------------------|-------------------|
|                                         |                               | Range       | MIC <sub>50</sub> | MIC <sub>90</sub> |
| <i>Achromobacter dolens</i><br>(n = 25) | Aztreonam                     | >32         | >32               | >32               |
|                                         | Ceftazidime                   | 4 to 32     | 8                 | 32                |
|                                         | Ceftazidime-avibactam         | 2 to 32     | 8                 | 16                |
|                                         | Ciprofloxacin                 | ≤0.5 to >8  | 2                 | 8                 |
|                                         | Colistin                      | ≤0.5 to >8  | 2                 | >8                |
|                                         | Ceftolozane-tazobactam        | 8 to >32    | >32               | >32               |
|                                         | Imipenem                      | ≤0.5 to >32 | 1                 | 2                 |
|                                         | Levofloxacin                  | ≤0.5 to >8  | 2                 | 8                 |
|                                         | Meropenem                     | ≤0.5 to >32 | 1                 | 8                 |
|                                         | Meropenem-vaborbactam         | ≤0.5 to 32  | ≤0.5              | 4                 |
|                                         | Minocycline                   | ≤0.25 to 8  | 1                 | 4                 |
|                                         | Moxifloxacin                  | ≤0.5 to >8  | 4                 | >8                |
|                                         | Piperacillin-tazobactam       | ≤2 to >128  | ≤2                | >128              |
|                                         | Tigecycline                   | ≤0.25 to 4  | 0.5               | 2                 |
|                                         | Trimethoprim-sulfamethoxazole | ≤0.5 to >8  | ≤0.5              | 8                 |

| Species or group                           | Antimicrobial                 | MIC (µg/ml) |                   |                   |
|--------------------------------------------|-------------------------------|-------------|-------------------|-------------------|
|                                            |                               | Range       | MIC <sub>50</sub> | MIC <sub>90</sub> |
| <i>Achromobacter ruhlandii</i><br>(n = 25) | Aztreonam                     | 32 to >32   | >32               | >32               |
|                                            | Ceftazidime                   | 2 to >32    | 8                 | >32               |
|                                            | Ceftazidime-avibactam         | 2 to 32     | 8                 | 16                |
|                                            | Ciprofloxacin                 | ≤0.5 to >8  | 8                 | >8                |
|                                            | Colistin                      | ≤0.5 to >8  | 4                 | >8                |
|                                            | Ceftolozane-tazobactam        | ≤0.5 to >32 | >32               | >32               |
|                                            | Imipenem                      | ≤0.5 to 32  | 4                 | 16                |
|                                            | Levofloxacin                  | ≤0.5 to >8  | 8                 | >8                |
|                                            | Meropenem                     | ≤0.5 to >32 | 8                 | >32               |
|                                            | Meropenem-vaborbactam         | ≤0.5 to 16  | 2                 | 16                |
|                                            | Minocycline                   | 0.5 to 16   | 2                 | 8                 |
|                                            | Moxifloxacin                  | ≤0.5 to >8  | 4                 | >8                |
|                                            | Piperacillin-tazobactam       | ≤2 to >128  | 8                 | 128               |
|                                            | Tigecycline                   | ≤0.25 to 4  | 1                 | 4                 |
|                                            | Trimethoprim-sulfamethoxazole | ≤0.5 to >8  | ≤0.5              | 2                 |

| Species or group                              | Antimicrobial                 | MIC (µg/ml) |                   |                   |
|-----------------------------------------------|-------------------------------|-------------|-------------------|-------------------|
|                                               |                               | Range       | MIC <sub>50</sub> | MIC <sub>90</sub> |
| <i>Achromobacter xylosoxidans</i><br>(n = 50) | Aztreonam                     | 32 to >32   | >32               | >32               |
|                                               | Ceftazidime                   | 1 to >32    | 8                 | >32               |
|                                               | Ceftazidime-avibactam         | 1 to >32    | 8                 | 32                |
|                                               | Ciprofloxacin                 | 1 to >8     | 4                 | >8                |
|                                               | Colistin                      | ≤0.5 to >8  | 4                 | >8                |
|                                               | Ceftolozane-tazobactam        | 8 to >32    | >32               | >32               |
|                                               | Imipenem                      | 1 to >32    | 2                 | 4                 |
|                                               | Levofloxacin                  | 1 to >8     | 4                 | >8                |
|                                               | Meropenem                     | ≤0.5 to >32 | ≤0.5              | 32                |
|                                               | Meropenem-vaborbactam         | ≤0.5 to 32  | ≤0.5              | 8                 |
|                                               | Minocycline                   | ≤0.25 to 16 | 4                 | 8                 |
|                                               | Moxifloxacin                  | 1 to >8     | 4                 | >8                |
|                                               | Piperacillin-tazobactam       | ≤2 to >128  | ≤2                | 16                |
|                                               | Tigecycline                   | ≤0.25 to 4  | 1                 | 2                 |
|                                               | Trimethoprim-sulfamethoxazole | ≤0.5 to >8  | ≤0.5              | 4                 |

| Species or group                             | Antimicrobial                 | MIC (µg/ml)  |                   |                   |
|----------------------------------------------|-------------------------------|--------------|-------------------|-------------------|
|                                              |                               | Range        | MIC <sub>50</sub> | MIC <sub>90</sub> |
| <i>Burkholderia</i> , all isolates (n = 200) | Aztreonam                     | ≤1 to >32    | 16                | >32               |
|                                              | Ceftazidime                   | ≤0.5 to >32  | 4                 | 16                |
|                                              | Ceftazidime-avibactam         | ≤0.5 to >32  | 4                 | 16                |
|                                              | Ciprofloxacin                 | ≤0.5 to >8   | 1                 | 4                 |
|                                              | Colistin                      | 1 to >8      | >8                | >8                |
|                                              | Ceftolozane-tazobactam        | ≤0.5 to >32  | 2                 | 16                |
|                                              | Imipenem                      | ≤0.5 to >32  | 4                 | 16                |
|                                              | Levofloxacin                  | ≤0.5 to >8   | 1                 | 4                 |
|                                              | Meropenem                     | ≤0.5 to >32  | 2                 | 4                 |
|                                              | Meropenem-vaborbactam         | ≤0.5 to >32  | 1                 | 2                 |
|                                              | Minocycline                   | ≤0.25 to >16 | 1                 | 4                 |
|                                              | Moxifloxacin                  | ≤0.5 to >8   | 1                 | 4                 |
|                                              | Piperacillin-tazobactam       | ≤2 to >128   | ≤2                | 32                |
|                                              | Tigecycline                   | ≤0.25 to >8  | 1                 | 4                 |
|                                              | Trimethoprim-sulfamethoxazole | ≤0.5 to 4    | ≤0.5              | 1                 |



| Species or group                            | Antimicrobial                 | MIC (µg/ml) |                   |                   |
|---------------------------------------------|-------------------------------|-------------|-------------------|-------------------|
|                                             |                               | Range       | MIC <sub>50</sub> | MIC <sub>90</sub> |
| <i>Burkholderia cenocepacia</i><br>(n = 50) | Aztreonam                     | 8 to >32    | 16                | >32               |
|                                             | Ceftazidime                   | ≤0.5 to >32 | 4                 | 8                 |
|                                             | Ceftazidime-avibactam         | 2 to 16     | 4                 | 4                 |
|                                             | Ciprofloxacin                 | ≤0.5 to >8  | 1                 | 4                 |
|                                             | Colistin                      | 1 to >8     | >8                | >8                |
|                                             | Ceftolozane-tazobactam        | ≤0.5 to >32 | 1                 | 4                 |
|                                             | Imipenem                      | 2 to >32    | 8                 | 16                |
|                                             | Levofloxacin                  | ≤0.5 to >8  | 2                 | 8                 |
|                                             | Meropenem                     | 1 to 16     | 2                 | 4                 |
|                                             | Meropenem-vaborbactam         | ≤0.5 to 16  | 1                 | 2                 |
|                                             | Minocycline                   | ≤0.25 to 16 | 1                 | 8                 |
|                                             | Moxifloxacin                  | ≤0.5 to >8  | 1                 | 4                 |
|                                             | Piperacillin-tazobactam       | ≤2 to >128  | 4                 | 128               |
|                                             | Tigecycline                   | ≤0.25 to 8  | 0.5               | 4                 |
|                                             | Trimethoprim-sulfamethoxazole | ≤0.5 to 4   | ≤0.5              | 1                 |

| Species or group                        | Antimicrobial                 | MIC (µg/ml) |                   |                   |
|-----------------------------------------|-------------------------------|-------------|-------------------|-------------------|
|                                         |                               | Range       | MIC <sub>50</sub> | MIC <sub>90</sub> |
| <i>Burkholderia cepacia</i><br>(n = 20) | Aztreonam                     | 4 to >32    | 16                | >32               |
|                                         | Ceftazidime                   | 2 to 32     | 4                 | 16                |
|                                         | Ceftazidime-avibactam         | 2 to 16     | 4                 | 8                 |
|                                         | Ciprofloxacin                 | ≤0.5 to >8  | 1                 | 4                 |
|                                         | Colistin                      | >8          | >8                | >8                |
|                                         | Ceftolozane-tazobactam        | ≤0.5 to 8   | 1                 | 8                 |
|                                         | Imipenem                      | 4 to 16     | 8                 | 16                |
|                                         | Levofloxacin                  | 1 to >8     | 2                 | 8                 |
|                                         | Meropenem                     | 1 to 8      | 4                 | 8                 |
|                                         | Meropenem-vaborbactam         | ≤0.5 to 2   | 1                 | 2                 |
|                                         | Minocycline                   | 0.5 to 16   | 2                 | 8                 |
|                                         | Moxifloxacin                  | ≤0.5 to >8  | 1                 | 8                 |
|                                         | Piperacillin-tazobactam       | ≤2 to 128   | 16                | 64                |
|                                         | Tigecycline                   | ≤0.25 to >8 | 1                 | 4                 |
|                                         | Trimethoprim-sulfamethoxazole | ≤0.5 to 1   | ≤0.5              | 1                 |

| Species or group                            | Antimicrobial                 | MIC (µg/ml) |                   |                   |
|---------------------------------------------|-------------------------------|-------------|-------------------|-------------------|
|                                             |                               | Range       | MIC <sub>50</sub> | MIC <sub>90</sub> |
| <i>Burkholderia contaminans</i><br>(n = 10) | Aztreonam                     | 8 to >32    | 32                | >32               |
|                                             | Ceftazidime                   | 2 to 8      | 4                 | 4                 |
|                                             | Ceftazidime-avibactam         | 2 to 4      | 4                 | 4                 |
|                                             | Ciprofloxacin                 | ≤0.5 to 8   | 1                 | 1                 |
|                                             | Colistin                      | >8          | >8                | >8                |
|                                             | Ceftolozane-tazobactam        | 1 to 4      | 2                 | 2                 |
|                                             | Imipenem                      | 4 to 8      | 8                 | 8                 |
|                                             | Levofloxacin                  | 1 to 8      | 2                 | 2                 |
|                                             | Meropenem                     | 2 to 4      | 4                 | 4                 |
|                                             | Meropenem-vaborbactam         | ≤0.5 to 2   | 1                 | 1                 |
|                                             | Minocycline                   | 1 to 8      | 2                 | 4                 |
|                                             | Moxifloxacin                  | ≤0.5 to 8   | 1                 | 2                 |
|                                             | Piperacillin-tazobactam       | ≤2 to 32    | 8                 | 32                |
|                                             | Tigecycline                   | ≤0.25 to 2  | 1                 | 2                 |
|                                             | Trimethoprim-sulfamethoxazole | ≤0.5 to 2   | 1                 | 2                 |

| Species or group                         | Antimicrobial                 | MIC (µg/ml) |                   |                   |
|------------------------------------------|-------------------------------|-------------|-------------------|-------------------|
|                                          |                               | Range       | MIC <sub>50</sub> | MIC <sub>90</sub> |
| <i>Burkholderia gladioli</i><br>(n = 50) | Aztreonam                     | 4 to >32    | 32                | >32               |
|                                          | Ceftazidime                   | 4 to >32    | 16                | 32                |
|                                          | Ceftazidime-avibactam         | 2 to >32    | 16                | 16                |
|                                          | Ciprofloxacin                 | ≤0.5 to 8   | ≤0.5              | ≤0.5              |
|                                          | Colistin                      | 1 to >8     | >8                | >8                |
|                                          | Ceftolozane-tazobactam        | 2 to >32    | 16                | 32                |
|                                          | Imipenem                      | ≤0.5 to 2   | ≤0.5              | 2                 |
|                                          | Levofloxacin                  | ≤0.5 to 8   | ≤0.5              | 1                 |
|                                          | Meropenem                     | ≤0.5 to 4   | 1                 | 2                 |
|                                          | Meropenem-vaborbactam         | ≤0.5 to 4   | 1                 | 2                 |
|                                          | Minocycline                   | ≤0.25 to 8  | 2                 | 2                 |
|                                          | Moxifloxacin                  | ≤0.5 to 4   | ≤0.5              | ≤0.5              |
|                                          | Piperacillin-tazobactam       | ≤2 to 4     | ≤2                | ≤2                |
|                                          | Tigecycline                   | ≤0.25 to 4  | 0.5               | 1                 |
|                                          | Trimethoprim-sulfamethoxazole | ≤0.5        | ≤0.5              | ≤0.5              |

| Species or group                            | Antimicrobial                 | MIC (µg/ml) |                   |                   |
|---------------------------------------------|-------------------------------|-------------|-------------------|-------------------|
|                                             |                               | Range       | MIC <sub>50</sub> | MIC <sub>90</sub> |
| <i>Burkholderia multivorans</i><br>(n = 50) | Aztreonam                     | 2 to >32    | 4                 | >32               |
|                                             | Ceftazidime                   | 1 to >32    | 2                 | 16                |
|                                             | Ceftazidime-avibactam         | ≤0.5 to >32 | 2                 | 4                 |
|                                             | Ciprofloxacin                 | ≤0.5 to >8  | 1                 | >8                |
|                                             | Colistin                      | 1 to >8     | >8                | >8                |
|                                             | Ceftolozane-tazobactam        | ≤0.5 to >32 | 1                 | 32                |
|                                             | Imipenem                      | ≤0.5 to >32 | 16                | 32                |
|                                             | Levofloxacin                  | ≤0.5 to >8  | 2                 | 8                 |
|                                             | Meropenem                     | ≤0.5 to >32 | 2                 | 8                 |
|                                             | Meropenem-vaborbactam         | ≤0.5 to >32 | 1                 | 2                 |
|                                             | Minocycline                   | ≤0.25 to 8  | 1                 | 4                 |
|                                             | Moxifloxacin                  | ≤0.5 to >8  | 1                 | 8                 |
|                                             | Piperacillin-tazobactam       | ≤2 to >128  | ≤2                | >128              |
|                                             | Tigecycline                   | ≤0.25 to >8 | 1                 | 8                 |
|                                             | Trimethoprim-sulfamethoxazole | ≤0.5 to 2   | ≤0.5              | 1                 |

| Species or group                              | Antimicrobial                 | MIC (µg/ml) |                   |                   |
|-----------------------------------------------|-------------------------------|-------------|-------------------|-------------------|
|                                               |                               | Range       | MIC <sub>50</sub> | MIC <sub>90</sub> |
| <i>Burkholderia vietnamiensis</i><br>(n = 20) | Aztreonam                     | ≤1 to >32   | 4                 | 4                 |
|                                               | Ceftazidime                   | 1 to 8      | 2                 | 2                 |
|                                               | Ceftazidime-avibactam         | 1 to 4      | 2                 | 2                 |
|                                               | Ciprofloxacin                 | ≤0.5 to >8  | ≤0.5              | 1                 |
|                                               | Colistin                      | >8          | >8                | >8                |
|                                               | Ceftolozane-tazobactam        | ≤0.5 to 16  | 1                 | 2                 |
|                                               | Imipenem                      | ≤0.5 to 4   | ≤0.5              | ≤0.5              |
|                                               | Levofloxacin                  | ≤0.5 to >8  | 2                 | 2                 |
|                                               | Meropenem                     | ≤0.5 to 2   | ≤0.5              | 1                 |
|                                               | Meropenem-vaborbactam         | ≤0.5 to 1   | ≤0.5              | ≤0.5              |
|                                               | Minocycline                   | 0.5 to >16  | 1                 | 2                 |
|                                               | Moxifloxacin                  | ≤0.5 to >8  | 1                 | 1                 |
|                                               | Piperacillin-tazobactam       | ≤2 to 16    | ≤2                | ≤2                |
|                                               | Tigecycline                   | 0.5 to 8    | 1                 | 2                 |
|                                               | Trimethoprim-sulfamethoxazole | ≤0.5 to 1   | ≤0.5              | ≤0.5              |

| Species or group                                 | Antimicrobial                 | MIC (µg/ml) |                   |                   |
|--------------------------------------------------|-------------------------------|-------------|-------------------|-------------------|
|                                                  |                               | Range       | MIC <sub>50</sub> | MIC <sub>90</sub> |
| <i>Stenotrophomonas maltophilia</i><br>(n = 100) | Aztreonam                     | ≤1 to >32   | >32               | >32               |
|                                                  | Ceftazidime                   | ≤0.5 to >32 | 32                | >32               |
|                                                  | Ceftazidime-avibactam         | ≤0.5 to >32 | 16                | >32               |
|                                                  | Ciprofloxacin                 | ≤0.5 to >8  | 4                 | >8                |
|                                                  | Colistin                      | ≤0.5 to >8  | 1                 | >8                |
|                                                  | Ceftolozane-tazobactam        | ≤0.5 to >32 | 32                | >32               |
|                                                  | Imipenem                      | 4 to >32    | >32               | >32               |
|                                                  | Levofloxacin                  | ≤0.5 to >8  | 2                 | 8                 |
|                                                  | Meropenem                     | ≤0.5 to >32 | >32               | >32               |
|                                                  | Meropenem-vaborbactam         | ≤0.5 to >32 | >32               | >32               |
|                                                  | Minocycline                   | ≤0.25 to 4  | 0.5               | 2                 |
|                                                  | Moxifloxacin                  | ≤0.5 to >8  | 1                 | 4                 |
|                                                  | Piperacillin-tazobactam       | ≤2 to >128  | 128               | >128              |
|                                                  | Tigecycline                   | ≤0.25 to 4  | 0.5               | 2                 |
|                                                  | Trimethoprim-sulfamethoxazole | ≤0.5 to >8  | ≤0.5              | 1                 |

| Species or group                         | Antimicrobial                 | MIC (µg/ml) |                   |                   |
|------------------------------------------|-------------------------------|-------------|-------------------|-------------------|
|                                          |                               | Range       | MIC <sub>50</sub> | MIC <sub>90</sub> |
| <i>Pandoraea</i> , all isolates (n = 20) | Aztreonam                     | >32         | >32               | >32               |
|                                          | Ceftazidime                   | >32         | >32               | >32               |
|                                          | Ceftazidime-avibactam         | >32         | >32               | >32               |
|                                          | Ciprofloxacin                 | 1 to >8     | 4                 | >8                |
|                                          | Colistin                      | >8          | >8                | >8                |
|                                          | Ceftolozane-tazobactam        | >32         | >32               | >32               |
|                                          | Imipenem                      | 1 to >32    | 2                 | 4                 |
|                                          | Levofloxacin                  | 1 to >8     | 4                 | >8                |
|                                          | Meropenem                     | 32 to >32   | >32               | >32               |
|                                          | Meropenem-vaborbactam         | 32 to >32   | >32               | >32               |
|                                          | Minocycline                   | 0.5 to 8    | 2                 | 4                 |
|                                          | Moxifloxacin                  | 1 to >8     | 4                 | 8                 |
|                                          | Piperacillin-tazobactam       | 8 to >128   | 64                | >128              |
|                                          | Tigecycline                   | 0.5 to 8    | 2                 | 8                 |
|                                          | Trimethoprim-sulfamethoxazole | ≤0.5 to 4   | ≤0.5              | ≤0.5              |



| Species or group                    | Antimicrobial                 | MIC (µg/ml) |                   |                   |
|-------------------------------------|-------------------------------|-------------|-------------------|-------------------|
|                                     |                               | Range       | MIC <sub>50</sub> | MIC <sub>90</sub> |
| <i>Pandoraea apista</i><br>(n = 10) | Aztreonam                     | >32         | >32               | >32               |
|                                     | Ceftazidime                   | >32         | >32               | >32               |
|                                     | Ceftazidime-avibactam         | >32         | >32               | >32               |
|                                     | Ciprofloxacin                 | 1 to >8     | 2                 | >8                |
|                                     | Colistin                      | >8          | >8                | >8                |
|                                     | Ceftolozane-tazobactam        | >32         | >32               | >32               |
|                                     | Imipenem                      | 2 to >32    | 4                 | 16                |
|                                     | Levofloxacin                  | 1 to >8     | 2                 | >8                |
|                                     | Meropenem                     | >32         | >32               | >32               |
|                                     | Meropenem-vaborbactam         | >32         | >32               | >32               |
|                                     | Minocycline                   | 2 to 8      | 2                 | 8                 |
|                                     | Moxifloxacin                  | 1 to >8     | 1                 | 8                 |
|                                     | Piperacillin-tazobactam       | 32 to >128  | >128              | >128              |
|                                     | Tigecycline                   | 0.5 to 8    | 1                 | 8                 |
|                                     | Trimethoprim-sulfamethoxazole | ≤0.5 to 4   | ≤0.5              | ≤0.5              |

| Species or group                      | Antimicrobial                 | MIC (µg/ml) |                   |                   |
|---------------------------------------|-------------------------------|-------------|-------------------|-------------------|
|                                       |                               | Range       | MIC <sub>50</sub> | MIC <sub>90</sub> |
| <i>Pandoraea sputorum</i><br>(n = 10) | Aztreonam                     | >32         | >32               | >32               |
|                                       | Ceftazidime                   | >32         | >32               | >32               |
|                                       | Ceftazidime-avibactam         | >32         | >32               | >32               |
|                                       | Ciprofloxacin                 | 2 to >8     | 4                 | 8                 |
|                                       | Colistin                      | >8          | >8                | >8                |
|                                       | Ceftolozane-tazobactam        | >32         | >32               | >32               |
|                                       | Imipenem                      | 1 to 2      | 1                 | 1                 |
|                                       | Levofloxacin                  | 4 to >8     | 8                 | >8                |
|                                       | Meropenem                     | 32 to >32   | >32               | >32               |
|                                       | Meropenem-vaborbactam         | 32 to >32   | >32               | >32               |
|                                       | Minocycline                   | 0.5 to 4    | 2                 | 2                 |
|                                       | Moxifloxacin                  | 4 to >8     | 4                 | 8                 |
|                                       | Piperacillin-tazobactam       | 8 to >128   | 64                | 128               |
|                                       | Tigecycline                   | 1 to 8      | 2                 | 4                 |
|                                       | Trimethoprim-sulfamethoxazole | ≤0.5        | ≤0.5              | ≤0.5              |
